# Supplementary material for: Species-specific vulnerability of RanBP2 shaped the evolution of SIV as it transmitted in African apes
Source: PubMed Central journal article supplement (PMC5843284; doi:10.1371/journal.ppat.1006906), 2018-03-08
Supplement: ppat.1006906.s001.pdf [file ppat.1006906.s001.pdf]

**Table S1. Primers used in this study**

| Primer Name | Primer Sequence (5' -> 3')                                | Details                                                                                                                                                                         |                                                            |
|-------------|-----------------------------------------------------------|---------------------------------------------------------------------------------------------------------------------------------------------------------------------------------|------------------------------------------------------------|
| IR037       | AAATGGTATCATGCCAAATCTAAACCCAAGC                           | RanBP2 amplicon (5684 bps) containing RanCyp domain                                                                                                                             | <b>Amplify and sequence RanCyp and CypA</b>                |
| NRM038      | CTGCAATTTTACATTTGTAAATCGGAACGCTC                          | Phusion in HF buffer + 3% DMSO - 58°C anneal - 1 min 40 s elongation                                                                                                            |                                                            |
| NRM376      | GARCAATAGTGTACTACAGAGG                                    | Sequencing primers for RanCyp domain                                                                                                                                            |                                                            |
| NRM377      | GGACTGCTGAGAATCTCAGAGC                                    |                                                                                                                                                                                 |                                                            |
| NRM445      | TGGTATAAAAGGGGGGGGAGG                                     | CypA amplicon (756 bps)                                                                                                                                                         | <b>Generate TRIM-RanCyp chimeras</b>                       |
| NRM448      | CATAAACTTAACCTGCAATCCAGCTAGG                              | Phusion in HF buffer - 60°C anneal - 15s elongation                                                                                                                             |                                                            |
| NRM447      | AACCCAAAGGAACCTGACGCG                                     | Sequencing primer for CypA                                                                                                                                                      |                                                            |
| NRM523      | GGTCTGGTGTCTGGTCT ATGGCTTCCGAATCCTGGTCAATA                | Owl monkey TRIM-Cyp RBCC fragment containing N-term linker for HA addition and C-term overlap for human, chimp, gorilla, orangutan, red-capped mangabey, and titi monkey RanCyp |                                                            |
| NRM524      | CCACAGGATTTGGTCTCCCTTTGATAAGGCTGATGCTACAAGGTCC            | Used with NRM523 to generate TRIM-Cyp fragment with C-term overlap for marmoset RanCyp                                                                                          |                                                            |
| NRM525      | CCACAGGATTTGGTCTCCCTTTGATAAGGCTGATGCTACAAGGTCC            |                                                                                                                                                                                 |                                                            |
| NRM526      | GGACTTGTAGCATCAGCCTTATCAAGGAGACCAATCCTGTGG                | RanCyp domains containing N-term overlap with owl monkey TRIM-Cyp RBCC fragment                                                                                                 |                                                            |
| NRM527      | GGACTTGTAGCATCAGCCTTATCAAGGAGACCAATCCTGTGG                | NRM526/NRM510 - human, chimp, gorilla, orangutan, red-capped mangabey fragments                                                                                                 |                                                            |
| NRM510      | TCATATCTGTCCAACTCTGTGATAG                                 | NRM527/NRM511 - marmoset fragment                                                                                                                                               |                                                            |
| NRM511      | TCAAATCTGTCCAACTCTGTGATAG                                 | NRM526/NRM511 - titi monkey fragment                                                                                                                                            |                                                            |
| NRM531      | TTAAGTTTCCACACTCAGCAATGG                                  | Used with NRM523 to generate full-length owl monkey TRIM-Cyp with N-term epitope linker                                                                                         |                                                            |
| NRM530      | TGCGCACCATGGGTTAGCCATAACGAGCTCCACAGACTACGCCGTGGTGGTGGTGGT | Adds N-terminal HA tag                                                                                                                                                          |                                                            |
| NRM1136     | CATGATGGAACAGGGCAGCAGTCCATTTATGGAGACAAT                   | G75R point mutation in the human TRIM-RanCyp background                                                                                                                         | <b>Generate TRIM-RanCyp mutants</b>                        |
| NRM1137     | CATAAATGGACTGTCTGCGCTTCCATCATGTTTGGTGT                    |                                                                                                                                                                                 |                                                            |
| NRM1138     | CATGATGGAACAGGGCAGCAGTCCATTTATGGAGACAGAT                  | R75G point mutation in the gorilla TRIM-RanCyp background                                                                                                                       |                                                            |
| NRM1139     | CATAAATGGACTGTCTGCGCTTCCATCATGTTTGGTGT                    |                                                                                                                                                                                 |                                                            |
| NRM1140     | CCATTTATGGAGACAGATTTGAAGATGAAATTTTGATGT                   | K82R point mutation in the human TRIM-RanCyp background                                                                                                                         |                                                            |
| NRM1141     | TTTTCACTTCAAATCTGTCTCCATAAATGACTGTCCCG                    |                                                                                                                                                                                 |                                                            |
| NRM1142     | CCATTTATGGAGACAGATTTGAAGATGAAATTTTGATGT                   | R82K point mutation in the gorilla TRIM-RanCyp background                                                                                                                       |                                                            |
| NRM1143     | TTTTCACTTCAAATTTGTCTCCATAAATGACTGTCTCCG                   |                                                                                                                                                                                 |                                                            |
| NRM557      | CTATCCATGGCCAAATGAAAGCCAGAATACCA                          | Q103E point mutation in the human or chimp TRIM-RanCyp background                                                                                                               |                                                            |
| NRM558      | TGGTATCTGGCCTTCAATGGCCATGGATAG                            |                                                                                                                                                                                 |                                                            |
| NRM559      | CTATCCATGGCCAAATGAAAGCCAGAATACCA                          | E103Q point mutation in the gorilla TRIM-RanCyp background                                                                                                                      |                                                            |
| NRM560      | TGGTATCTGGCCTTCAATGGCCATGGATAG                            |                                                                                                                                                                                 |                                                            |
| NRM1144     | AATAATCTCAAATTTTATAACACTGAAGAAGCAGAAC                     | V113F point mutation in the human TRIM-RanCyp background                                                                                                                        |                                                            |
| NRM1145     | TCTTCAGTGTATAAAAAATGAGAATTTGGTATTCTG                      |                                                                                                                                                                                 |                                                            |
| NRM1146     | AATAATCTCAAATTTTATAACACTGAAGAAGCAGAAC                     | F113V point mutation in the chimp or gorilla TRIM-RanCyp background                                                                                                             |                                                            |
| NRM1147     | TCTTCAGTGTATAACAAAAATGAGAATTTGGTATTCTG                    |                                                                                                                                                                                 |                                                            |
| NRM1148     | TCATTTGGTCTCCCGAAGGCTGTGTTGTGGAAGAATAA                    | K149E point mutation in the human TRIM-RanCyp background                                                                                                                        |                                                            |
| NRM1149     | GACAAACAGACCTTCGGGAGAACCAATGATTCATCTT                     |                                                                                                                                                                                 |                                                            |
| NRM1150     | TCATTTGGTCTCCCGAAGGCTGTGTTGTGGAAGAATAA                    | E149K point mutation in the gorilla TRIM-RanCyp background                                                                                                                      |                                                            |
| NRM1151     | GACAAACAGACCTTCGGGAGAACCAATGATTCATCTT                     |                                                                                                                                                                                 |                                                            |
| NRM561      | GGGATAGATGCATCCAGCGTGTAGGGCCCTTCCAGTAGCCAGATGAGAGAACC     | Swaps SIVgor CP684 cyclophilin-binding loop into pMDLG backbone                                                                                                                 | <b>Generate capsid - cyclophilin binding loop chimeras</b> |
| NRM562      | GTTTCTCATCTGGCCCTAGGAAGAGGCCCTACAACCGCTGGATGCACTCTATCCC   | Swaps SIVgor BP664 cyclophilin-binding loop into pMDLG backbone                                                                                                                 |                                                            |
| NRM563      | GGGATAGATGCATCCAGCCCTGTAGGGCCCTTCCAGCCAGCCAGATGAGAGAACC   |                                                                                                                                                                                 |                                                            |
| NRM564      | GTTTCTCATCTGGCCCTAGGAAGAGGCCCTACAAGGCTGTGGATGCACTCTATCCC  | Swaps SIVcpz CAM155 cyclophilin-binding loop into pMDLG backbone                                                                                                                |                                                            |
| NRM609      | AGAGTCATCCCAACGCATCAGGGCCCTTGTACAGCCAGATGAGAGAACC         |                                                                                                                                                                                 |                                                            |
| NRM610      | ATCTGGCCGTGTACAGAGGCCCTGATGCTGTGGATGCACTCTATCCCATCTGC     | Swaps SIVcpz CAM3 cyclophilin-binding loop into pMDLG backbone                                                                                                                  |                                                            |
| NRM611      | CATGCAGGCCCTGTGCACAGGCCAGATGAGAG                          |                                                                                                                                                                                 |                                                            |
| NRM612      | GGCCGTGTGCAACAGGCCCTGATGCTGTGGATG                         | Swaps SIVcpz LB7 cyclophilin-binding loop into pMDLG backbone                                                                                                                   |                                                            |
| NRM613      | AGAGTCATCCCAATCCATATGGGGCCCTATGCAAGCCAGCCAG               |                                                                                                                                                                                 |                                                            |
| NRM614      | TGCAATAGCCCCATATGGAATGGATGGACTCTATCCCATTC                 | Swaps SIVcpz TAN cyclophilin-binding loop into pMDLG backbone                                                                                                                   |                                                            |
| NRM615      | GAGTGCATCCAGCCGATGCAAGGCCCTCAACAGCAGGCCAGATGAGAGAACC      |                                                                                                                                                                                 |                                                            |
| NRM616      | TCATCTGGCCGTGTGTTGAGAGGCCCTGTACAGCCGTGGATGCACTCTATCCC     | Swaps SIVcpz ANT cyclophilin-binding loop into pMDLG backbone containing SIVcpz TAN loop                                                                                        |                                                            |
| NRM669      | AGAGTCATCCCAACGCATCAGGGCCCTGTACAGCAGGCCAGATGAGAG          |                                                                                                                                                                                 |                                                            |
| NRM670      | TGGCCCTGTGTACAGGCCCTGCATGCTGTGATGCACTCTATCCCATTC          | Swaps SIVrcm NG cyclophilin-binding loop into pMDLG backbone containing SIVgor BQ664 loop                                                                                       |                                                            |
| NRM671      | AGAGTCATCCCAACCCGTGGCCCTTCCAGCAGGCCAGATGAGAGAACCAG        |                                                                                                                                                                                 |                                                            |
| NRM672      | TCATCTGGCCGTGTGGAAGAGGCCCCAGGGTGGGATGCACTCTATCCCATTC      | Swaps SIVrcm CAM cyclophilin-binding loop into pMDLG backbone containing SIVrcm NG loop                                                                                         |                                                            |
| NRM673      | AGAGTCATCCCAACCTGTGGCCCTTCCAGCAGGCCAG                     |                                                                                                                                                                                 |                                                            |
| NRM674      | TGCTGGAAGAGGCCCAAGGTTGGATGCACTCTATCCC                     | Swaps SIVrcm GAB cyclophilin-binding loop into pMDLG backbone containing SIVrcm NG loop                                                                                         |                                                            |
| NRM675      | GAGTGCATCCCGCTCTGGCCCTATTCCAGCAGGCCAGATGAG                |                                                                                                                                                                                 |                                                            |
| NRM676      | CTGGCCGTGTGGAATAGGCCCCAGGGAGGGATGCACTCTATCCC              | Swaps SIVmac cyclophilin-binding loop into pMDLG backbone containing SIVcpz TAN loop                                                                                            |                                                            |
| NRM677      | AGAGTCATCCCAACCCGTGCACCTCAACAGGCCAGATGAGAGAACCAG          |                                                                                                                                                                                 |                                                            |
| NRM678      | TCTCATCTGGCCCTGTGAGGTCAGGCCCTGATGCACTCTATCCCATTC          |                                                                                                                                                                                 |                                                            |
