# Supplementary material for: Species-specific vulnerability of RanBP2 shaped the evolution of SIV as it transmitted in African apes
Source: PubMed Central journal article supplement (PMC5843284; doi:10.1371/journal.ppat.1006906), 2018-03-08

Figure S3

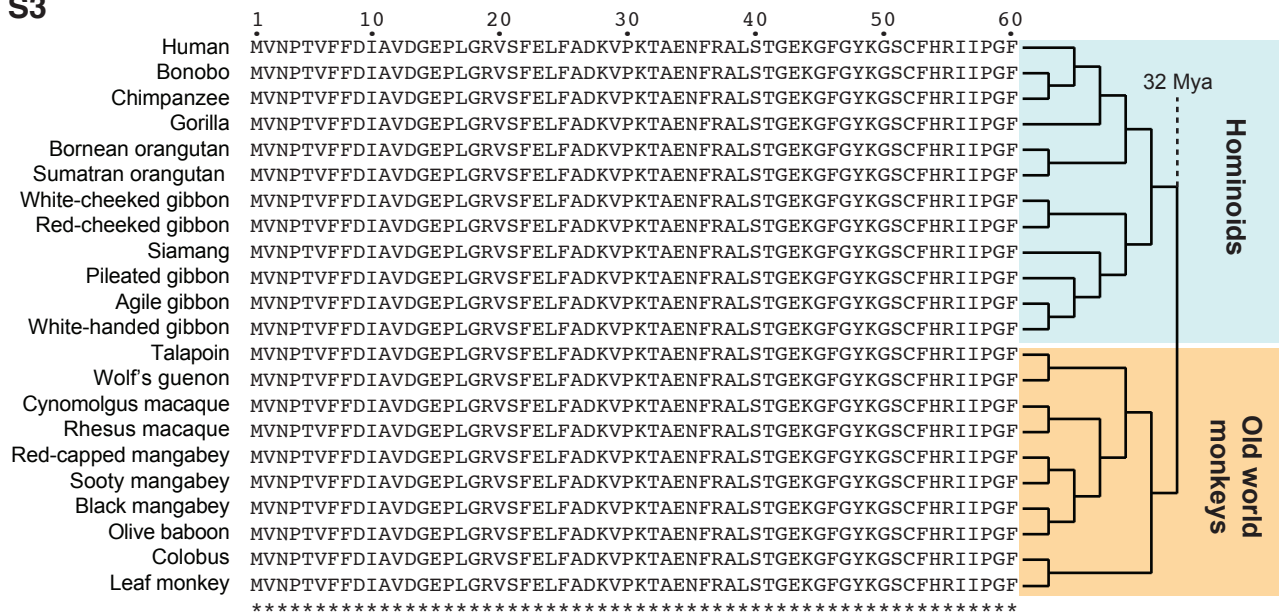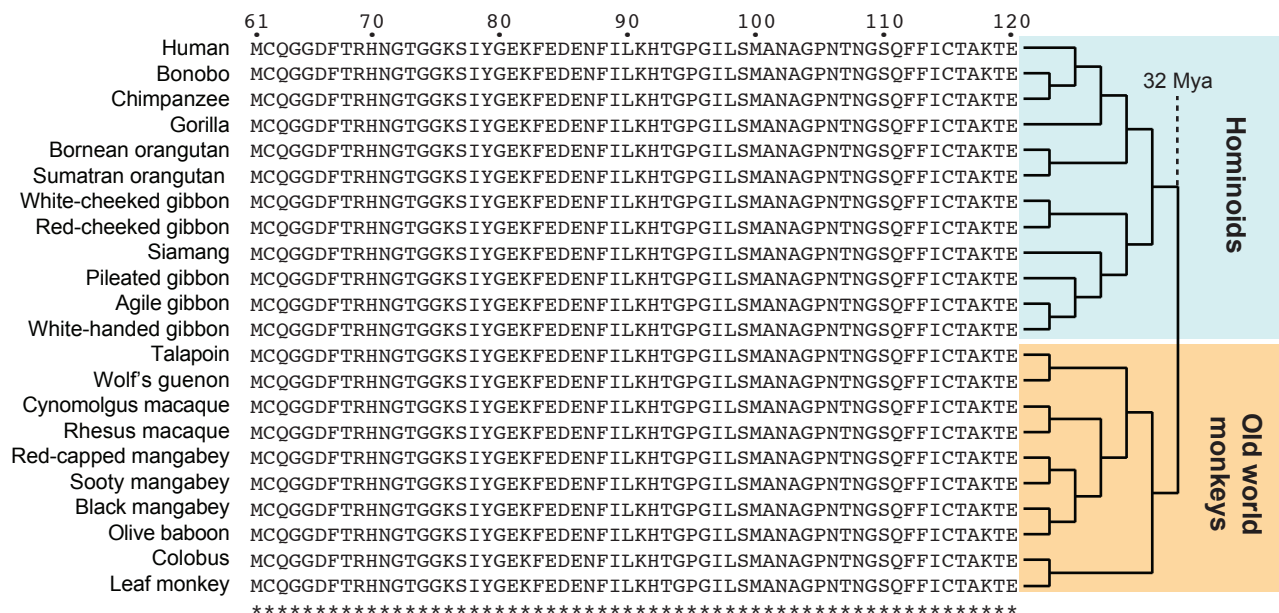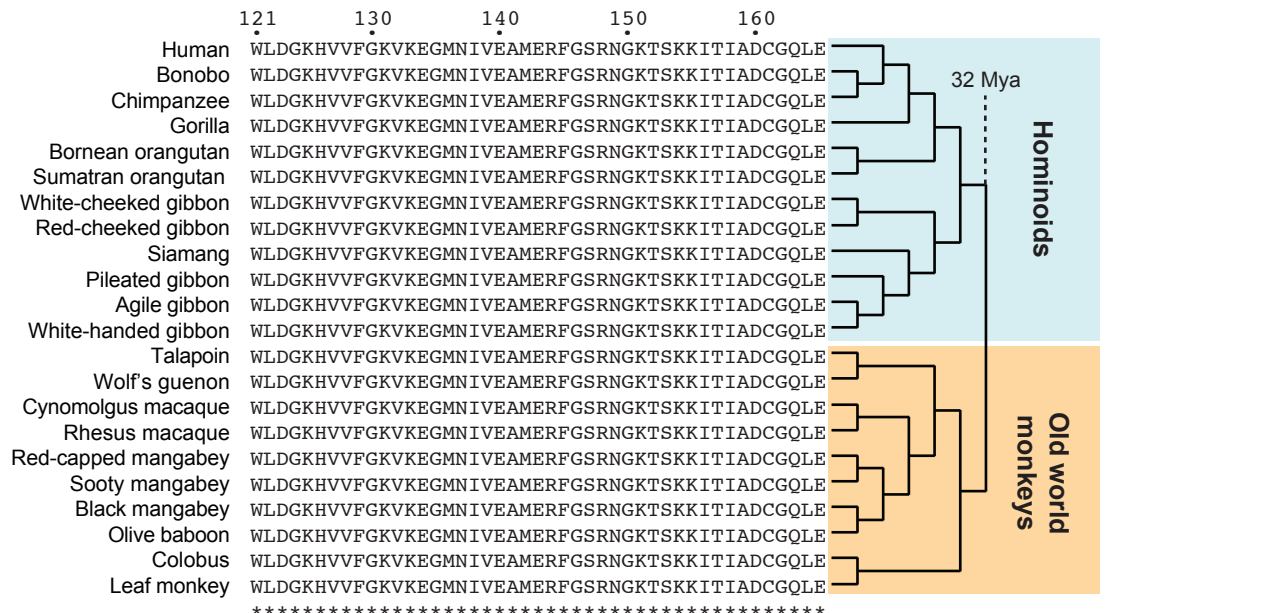

Supplement: ppat.1006906.s004.pdf [file ppat.1006906.s004.pdf]
