# Supplementary material for: Species-specific vulnerability of RanBP2 shaped the evolution of SIV as it transmitted in African apes
Source: PubMed Central journal article supplement (PMC5843284; doi:10.1371/journal.ppat.1006906), 2018-03-08
Supplement: ppat.1006906.s005.pdf [file ppat.1006906.s005.pdf]

Figure S4

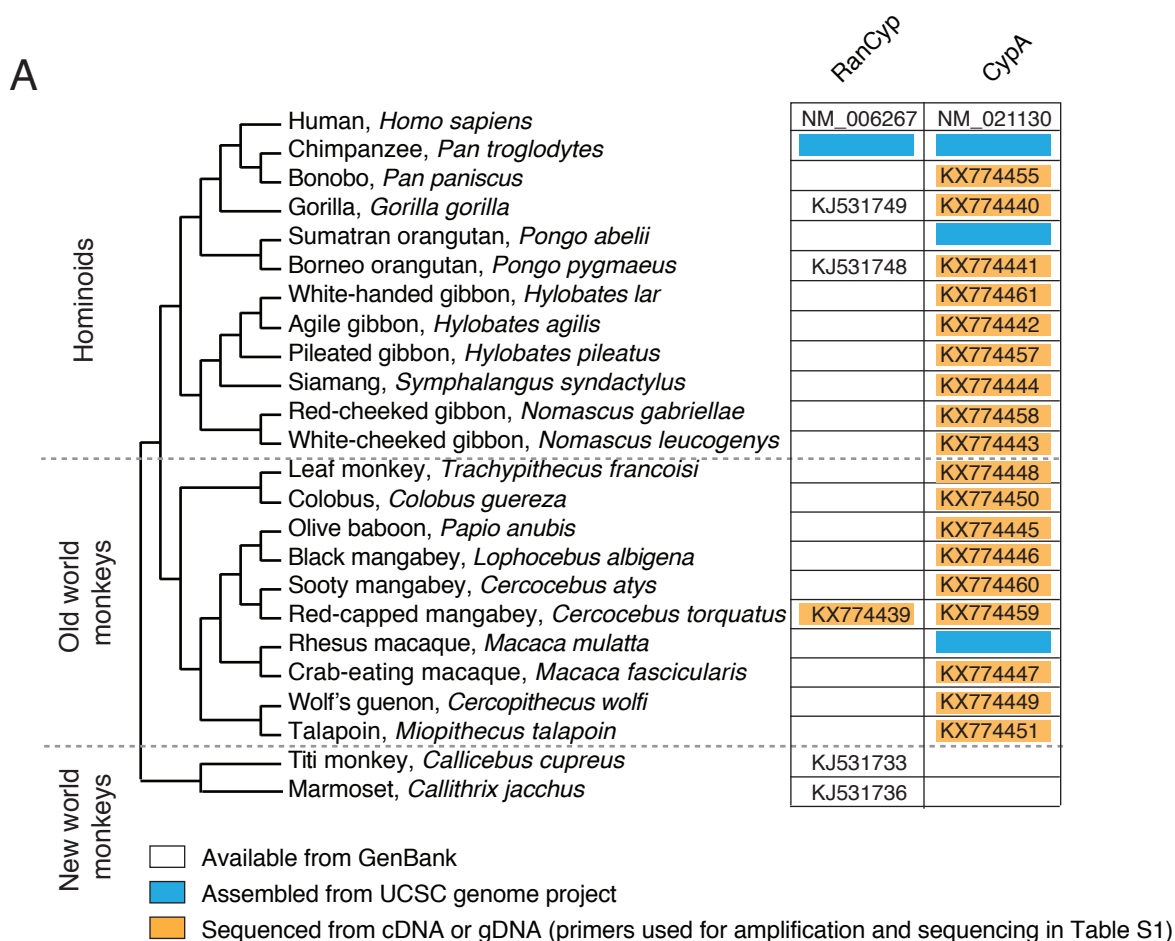

**B Source of DNA and RNA**

| Common Name          | Species Name                    | Source  | Unique ID | Cell type    |
|----------------------|---------------------------------|---------|-----------|--------------|
| Gorilla              | <i>Gorilla gorilla</i>          | Coriell | PR00280   | Fibroblasts  |
| Bonobo               | <i>Pan paniscus</i>             | Coriell | PR00748   | B-Lymphocyte |
| Borneo orangutan     | <i>Pongo pygmaeus</i>           | Coriell | PR00650   | B-Lymphocyte |
| Siamang              | <i>Hylobates syndactylus</i>    | Coriell | PR00722   | Fibroblasts  |
| White-cheeked gibbon | <i>Hylobates leucogenys</i>     | Coriell | PR01037   | Fibroblasts  |
| Agile gibbon         | <i>Hylobates agilis</i>         | Coriell | PR00773   | Fibroblasts  |
| Red-capped mangabey  | <i>Cercocebus torquatus</i>     | Coriell | PR00485   | Fibroblasts  |
| Talapoin             | <i>Miopithecus talapoin</i>     | Coriell | PR00716   | Fibroblasts  |
| Colobus              | <i>Colobus guereza</i>          | Coriell | PR00980   | Fibroblasts  |
| Leaf monkey          | <i>Trachypithecus francoisi</i> | Coriell | PR01099   | Fibroblasts  |
| Crab-eating macaque  | <i>Macaca fascicularis</i>      | NEPRC   | Mf27-04   | B-Lymphocyte |
| Olive baboon         | <i>Papio anubis</i>             | Coriell | PR00978   | Fibroblasts  |
| Black mangabey       | <i>Lophocebus albigena</i>      | Coriell | PR01215   | Fibroblasts  |
| Wolf's guenon        | <i>Cercopithecus wolfei</i>     | Coriell | PR01241   | Fibroblasts  |
| Marmoset             | <i>Callithrix jacchus</i>       | Coriell | GM07404   | B-Lymphocyte |
| Titi monkey          | <i>Callicebus cupreus</i>       | Coriell | PR00793   | Fibroblasts  |
| White-handed gibbon  | <i>Hylobates lar</i>            | Coriell | PR01131   | Fibroblasts  |
| Red-cheeked gibbon   | <i>Nomascus gabriellae</i>      | Coriell | PR00381   | Fibroblasts  |
| Pileated gibbon      | <i>Hylobates pileatus</i>       | Coriell | PR00243   | Fibroblasts  |
| Sooty mangabey       | <i>Cercocebus atys</i>          | NEPRC   | FJY       | B-Lymphocyte |

NEPRC = New England Primate Research Center
