# Supplementary material for: Species-specific vulnerability of RanBP2 shaped the evolution of SIV as it transmitted in African apes
Source: PLoS Pathog. 2018 Mar 8;14(3):e1006906. doi: 10.1371/journal.ppat.1006906 (PMC5843284; doi:10.1371/journal.ppat.1006906)
Supplement: S2 Fig — A) Sequences for the N-terminal domain of lentiviral capsids were collected from NCBI and aligned using ClustalX. Secondary structure motifs are indicated above the alignment along with numbering relative to HIV-1 NL4-3 strain. Asterisks (*) indicate conserved amino acid positions. The cyclophilin-binding loop is indicated with a gray box. B) Crystal structure of the N-terminal domain of HIV-1 capsid (pdb: 1AK4) with secondary structure motifs labeled. The cyclophilin-binding loop is colored red. (PDF) [file ppat.1006906.s003.pdf]

Figure S2

A

| Accession Numbers |             | Beta Hairpin | $\alpha 1$ |           |         | $\alpha 2$ | $\alpha 3$ |          |           |
|-------------------|-------------|--------------|------------|-----------|---------|------------|------------|----------|-----------|
|                   |             |              | 10         | 20        | 30      | 40         | 50         | 60       |           |
| HQ179987          | HIV_P       | PIVQNAQGQMT  | HMPLSPRTL  | NAWVKAVEE | KAFNPEI | IPMF       | MA         | SEGAIPDD | INTMLNAV  |
| FJ424871          | SIVgorCP684 | PVVTNAQGQMV  | HQPLSPRTL  | NAWVKAVEE | KAFNPEI | IPMF       | MA         | SEGSIPYD | INTMLNAI  |
| FJ424868          | SIVgorBQ664 | PIIQNAQGQMV  | HQPLSPRTL  | NAWVKAVEE | KAFSPEI | IPMF       | MA         | SEGSIPYD | INTMLNAI  |
| U26942            | HIV_NL43    | PIVQNLQGQMV  | HQAI       | SPRTLNAW  | VKVVEE  | KAFSPEI    | IPMF       | SA       | SEGATPQD  |
| AF115393          | SIVcpzCAM3  | PVVQNAQGQL   | VHQPMSPRT  | LNAWVKV   | IEEKNFN | PEVIPMF    | MA         | SEGA     | TPQDVNTM  |
| AF447763          | SIVcpzTAN1  | PVITDAQGV    | ARHQPI     | SPRTLNAW  | VRVIEE  | KGFNPEI    | IPMF       | SA       | SEGATPYD  |
| AF349680          | SIVrcmNG    | PIVTINQ-Q    | PEHQPI     | SPRTLNAW  | VKVVEE  | KKFSAE     | V          | PMFSA    | SEGCIPYD  |
| AF028608          | SIVrcmGAB   | PIITINQ-Q    | PEHNPIS    | SPRTLNAW  | VKVVEE  | KKFSAE     | V          | PMFSA    | SEGCIPYD  |
| HM803689          | SIVrcmCAM   | PIITVNQ-Q    | PEHQPI     | SPRTLNAW  | VKVVEE  | KKFSAE     | V          | PMFSA    | SEGCIPYD  |
| AY588946          | SIVmac239   | PVQQIGG-NY   | VHLPLSPRT  | LNAWVKL   | IEEKKF  | SAE        | V          | PMFSA    | SEGCIPYD  |
|                   |             | *            | *          | *****     | ***     | *          | *          | *****    | * * * * * |
|                   |             |              |            |           |         |            |            |          |           |
|                   |             |              |            |           |         |            |            |          |           |
|                   |             |              |            |           |         |            |            |          |           |
|                   |             |              |            |           |         |            |            |          |           |
|                   |             |              |            |           |         |            |            |          |           |
|                   |             |              |            |           |         |            |            |          |           |
|                   |             |              |            |           |         |            |            |          |           |
|                   |             |              |            |           |         |            |            |          |           |
|                   |             |              |            |           |         |            |            |          |           |
|                   |             |              |            |           |         |            |            |          |           |
|                   |             |              |            |           |         |            |            |          |           |
|                   |             |              |            |           |         |            |            |          |           |
|                   |             |              |            |           |         |            |            |          |           |
|                   |             |              |            |           |         |            |            |          |           |
|                   |             |              |            |           |         |            |            |          |           |
|                   |             |              |            |           |         |            |            |          |           |
|                   |             |              |            |           |         |            |            |          |           |
|                   |             |              |            |           |         |            |            |          |           |
|                   |             |              |            |           |         |            |            |          |           |
|                   |             |              |            |           |         |            |            |          |           |
|                   |             |              |            |           |         |            |            |          |           |
|                   |             |              |            |           |         |            |            |          |           |
|                   |             |              |            |           |         |            |            |          |           |
|                   |             |              |            |           |         |            |            |          |           |
|                   |             |              |            |           |         |            |            |          |           |
|                   |             |              |            |           |         |            |            |          |           |
|                   |             |              |            |           |         |            |            |          |           |
|                   |             |              |            |           |         |            |            |          |           |
|                   |             |              |            |           |         |            |            |          |           |
|                   |             |              |            |           |         |            |            |          |           |
|                   |             |              |            |           |         |            |            |          |           |
|                   |             |              |            |           |         |            |            |          |           |
|                   |             |              |            |           |         |            |            |          |           |
|                   |             |              |            |           |         |            |            |          |           |
|                   |             |              |            |           |         |            |            |          |           |
|                   |             |              |            |           |         |            |            |          |           |
|                   |             |              |            |           |         |            |            |          |           |
|                   |             |              |            |           |         |            |            |          |           |
|                   |             |              |            |           |         |            |            |          |           |
|                   |             |              |            |           |         |            |            |          |           |
|                   |             |              |            |           |         |            |            |          |           |
|                   |             |              |            |           |         |            |            |          |           |
|                   |             |              |            |           |         |            |            |          |           |
|                   |             |              |            |           |         |            |            |          |           |
|                   |             |              |            |           |         |            |            |          |           |
|                   |             |              |            |           |         |            |            |          |           |
|                   |             |              |            |           |         |            |            |          |           |
|                   |             |              |            |           |         |            |            |          |           |
|                   |             |              |            |           |         |            |            |          |           |
|                   |             |              |            |           |         |            |            |          |           |
|                   |             |              |            |           |         |            |            |          |           |
|                   |             |              |            |           |         |            |            |          |           |
|                   |             |              |            |           |         |            |            |          |           |
|                   |             |              |            |           |         |            |            |          |           |
|                   |             |              |            |           |         |            |            |          |           |
|                   |             |              |            |           |         |            |            |          |           |
|                   |             |              |            |           |         |            |            |          |           |
|                   |             |              |            |           |         |            |            |          |           |
|                   |             |              |            |           |         |            |            |          |           |
|                   |             |              |            |           |         |            |            |          |           |
|                   |             |              |            |           |         |            |            |          |           |
|                   |             |              |            |           |         |            |            |          |           |
|                   |             |              |            |           |         |            |            |          |           |
|                   |             |              |            |           |         |            |            |          |           |
|                   |             |              |            |           |         |            |            |          |           |
|                   |             |              |            |           |         |            |            |          |           |
|                   |             |              |            |           |         |            |            |          |           |
|                   |             |              |            |           |         |            |            |          |           |
|                   |             |              |            |           |         |            |            |          |           |
|                   |             |              |            |           |         |            |            |          |           |
|                   |             |              |            |           |         |            |            |          |           |
|                   |             |              |            |           |         |            |            |          |           |
|                   |             |              |            |           |         |            |            |          |           |
|                   |             |              |            |           |         |            |            |          |           |
|                   |             |              |            |           |         |            |            |          |           |
|                   |             |              |            |           |         |            |            |          |           |
|                   |             |              |            |           |         |            |            |          |           |
|                   |             |              |            |           |         |            |            |          |           |
|                   |             |              |            |           |         |            |            |          |           |
|                   |             |              |            |           |         |            |            |          |           |
|                   |             |              |            |           |         |            |            |          |           |
|                   |             |              |            |           |         |            |            |          |           |
|                   |             |              |            |           |         |            |            |          |           |
|                   |             |              |            |           |         |            |            |          |           |
|                   |             |              |            |           |         |            |            |          |           |
|                   |             |              |            |           |         |            |            |          |           |
|                   |             |              |            |           |         |            |            |          |           |
|                   |             |              |            |           |         |            |            |          |           |
|                   |             |              |            |           |         |            |            |          |           |
|                   |             |              |            |           |         |            |            |          |           |
|                   |             |              |            |           |         |            |            |          |           |
|                   |             |              |            |           |         |            |            |          |           |
|                   |             |              |            |           |         |            |            |          |           |
|                   |             |              |            |           |         |            |            |          |           |
|                   |             |              |            |           |         |            |            |          |           |
|                   |             |              |            |           |         |            |            |          |           |
|                   |             |              |            |           |         |            |            |          |           |
|                   |             |              |            |           |         |            |            |          |           |
|                   |             |              |            |           |         |            |            |          |           |
|                   |             |              |            |           |         |            |            |          |           |
|                   |             |              |            |           |         |            |            |          |           |
|                   |             |              |            |           |         |            |            |          |           |
|                   |             |              |            |           |         |            |            |          |           |
|                   |             |              |            |           |         |            |            |          |           |
|                   |             |              |            |           |         |            |            |          |           |
|                   |             |              |            |           |         |            |            |          |           |
|                   |             |              |            |           |         |            |            |          |           |
|                   |             |              |            |           |         |            |            |          |           |
|                   |             |              |            |           |         |            |            |          |           |
|                   |             |              |            |           |         |            |            |          |           |
|                   |             |              |            |           |         |            |            |          |           |
|                   |             |              |            |           |         |            |            |          |           |
|                   |             |              |            |           |         |            |            |          |           |
|                   |             |              |            |           |         |            |            |          |           |
|                   |             |              |            |           |         |            |            |          |           |
|                   |             |              |            |           |         |            |            |          |           |
|                   |             |              |            |           |         |            |            |          |           |
|                   |             |              |            |           |         |            |            |          |           |
|                   |             |              |            |           |         |            |            |          |           |
|                   |             |              |            |           |         |            |            |          |           |
|                   |             |              |            |           |         |            |            |          |           |
|                   |             |              |            |           |         |            |            |          |           |
|                   |             |              |            |           |         |            |            |          |           |
|                   |             |              |            |           |         |            |            |          |           |
|                   |             |              |            |           |         |            |            |          |           |
|                   |             |              |            |           |         |            |            |          |           |
|                   |             |              |            |           |         |            |            |          |           |
|                   |             |              |            |           |         |            |            |          |           |
|                   |             |              |            |           |         |            |            |          |           |
|                   |             |              |            |           |         |            |            |          |           |
|                   |             |              |            |           |         |            |            |          |           |
|                   |             |              |            |           |         |            |            |          |           |
|                   |             |              |            |           |         |            |            |          |           |
|                   |             |              |            |           |         |            |            |          |           |
|                   |             |              |            |           |         |            |            |          |           |
|                   |             |              |            |           |         |            |            |          |           |
|                   |             |              |            |           |         |            |            |          |           |
|                   |             |              |            |           |         |            |            |          |           |
|                   |             |              |            |           |         |            |            |          |           |
|                   |             |              |            |           |         |            |            |          |           |
|                   |             |              |            |           |         |            |            |          |           |
|                   |             |              |            |           |         |            |            |          |           |
|                   |             |              |            |           |         |            |            |          |           |
|                   |             |              |            |           |         |            |            |          |           |
|                   |             |              |            |           |         |            |            |          |           |
|                   |             |              |            |           |         |            |            |          |           |
|                   |             |              |            |           |         |            |            |          |           |
|                   |             |              |            |           |         |            |            |          |           |
|                   |             |              |            |           |         |            |            |          |           |
|                   |             |              |            |           |         |            |            |          |           |
|                   |             |              |            |           |         |            |            |          |           |
|                   |             |              |            |           |         |            |            |          |           |
|                   |             |              |            |           |         |            |            |          |           |
|                   |             |              |            |           |         |            |            |          |           |
|                   |             |              |            |           |         |            |            |          |           |
|                   |             |              |            |           |         |            |            |          |           |
|                   |             |              |            |           |         |            |            |          |           |
|                   |             |              |            |           |         |            |            |          |           |
|                   |             |              |            |           |         |            |            |          |           |
|                   |             |              |            |           |         |            |            |          |           |
|                   |             |              |            |           |         |            |            |          |           |
|                   |             |              |            |           |         |            |            |          |           |
|                   |             |              |            |           |         |            |            |          |           |
|                   |             |              |            |           |         |            |            |          |           |
|                   |             |              |            |           |         |            |            |          |           |
|                   |             |              |            |           |         |            |            |          |           |
|                   |             |              |            |           |         |            |            |          |           |
|                   |             |              |            |           |         |            |            |          |           |
|                   |             |              |            |           |         |            |            |          |           |
|                   |             |              |            |           |         |            |            |          |           |
|                   |             |              |            |           |         |            |            |          |           |
|                   |             |              |            |           |         |            |            |          |           |
|                   |             |              |            |           |         |            |            |          |           |
|                   |             |              |            |           |         |            |            |          |           |
|                   |             |              |            |           |         |            |            |          |           |
|                   |             |              |            |           |         |            |            |          |           |
|                   |             |              |            |           |         |            |            |          |           |
|                   |             |              |            |           |         |            |            |          |           |
|                   |             |              |            |           |         |            |            |          |           |
|                   |             |              |            |           |         |            |            |          |           |
|                   |             |              |            |           |         |            |            |          |           |
|                   |             |              |            |           |         |            |            |          |           |
|                   |             |              |            |           |         |            |            |          |           |
|                   |             |              |            |           |         |            |            |          |           |
|                   |             |              |            |           |         |            |            |          |           |
|                   |             |              |            |           |         |            |            |          |           |
|                   |             |              |            |           |         |            |            |          |           |
|                   |             |              |            |           |         |            |            |          |           |
|                   |             |              |            |           |         |            |            |          |           |
|                   |             |              |            |           |         |            |            |          |           |
|                   |             |              |            |           |         |            |            |          |           |
|                   |             |              |            |           |         |            |            |          |           |
|                   |             |              |            |           |         |            |            |          |           |
|                   |             |              |            |           |         |            |            |          |           |
|                   |             |              |            |           |         |            |            |          |           |
|                   |             |              |            |           |         |            |            |          |           |
|                   |             |              |            |           |         |            |            |          |           |
|                   |             |              |            |           |         |            |            |          |           |
|                   |             |              |            |           |         |            |            |          |           |
|                   |             |              |            |           |         |            |            |          |           |
|                   |             |              |            |           |         |            |            |          |           |
|                   |             |              |            |           |         |            |            |          |           |
|                   |             |              |            |           |         |            |            |          |           |
|                   |             |              |            |           |         |            |            |          |           |
|                   |             |              |            |           |         |            |            |          |           |
|                   |             |              |            |           |         |            |            |          |           |
|                   |             |              |            |           |         |            |            |          |           |
|                   |             |              |            |           |         |            |            |          |           |
|                   |             |              |            |           |         |            |            |          |           |
|                   |             |              |            |           |         |            |            |          |           |
|                   |             |              |            |           |         |            |            |          |           |
|                   |             |              |            |           |         |            |            |          |           |
